# Supplementary material for: Depth-dependent parental effects create invisible barriers to coral dispersal
Source: PubMed Central journal article supplement (PMC7884412; doi:10.1038/s42003-021-01727-9), 2021-02-15
Supplement: 42003_2021_1727_MOESM2_ESM.pdf [file 42003_2021_1727_MOESM2_ESM.pdf]

## **Description of Additional Supplementary Files**

**File name:** Supplementary Data 1

**Description:** Raw data of the different experiments and surveys performed in this study.
